# Supplementary material
Source: publisher figshare collection journal article supplement (https://acs.figshare.com/ndownloader/files/25121277)
Supplement: Supplementary file 1 [file 25121277]

Compound	SMILES	Form	Ki MOR (h, nM)	EC50 MOR (h, nM)	Emax MOR (%)	Ki Sigma1R (h, nM)	cLogP	hERG IC50 (µM)	Alpha1AR % inh (1 µM)	Caco-2 Papp (nm/s)	pKa	logP	logD pH7.4	Thermodynamic Solubility pH7.4 (mg/mL)	Thermodynamic Solubility pH2 (mg/mL)	BCS Class	AMES	Paw Pressure Test (CD1 male mice); Emax	Paw Pressure Test (CD1 male mice); ED50	Paw Pressure Test with PRE-084 (64 mg/kg, sc); (CD1 male mice); Emax	Partial Sciatic Nerve Ligation Model (CD1 male mice); Emax
1	O=C1[C@H](O2)[C@]3(CCN4C)C(C2=C(OC)C=C5)=C5CC4[C@@]3(CC1)O		12 ± 3	17 ± 9	100	>10000	0	>10													51% (at 1.25 mg/kg, ip)
2	CC1=CC(OCCN2CCOCC2)=NN1C3=CC=C(C=CC=C4)C4=C3		>10000	>10000		17 ± 7	3.9	>10
3	O=C1C(C)OC2(CCN(CCC3=CC=CC=C3)CC2)CN1C4=CC=CC=C4		7 ± 6	14 ± 2	85	6 ± 0.4	4.2	0.4	72
4	O=C(C1(CC1)O2)N(C3=C(C(F)(F)F)N=CC=C3)CC42CCN(CCC5=CC=CC=C5F)CC4		175 ± 85	195 ± 19	100	58 ± 10	3.8	>10	57
14a	O=C1C(C)OC2(CCN(CCC3=CC=CC=C3)CC2)CN1CC4=CC=CC=C4	HCl	2 ± 0.3	2 ± 0.1	97	10 ± 3	3.9	0.1	67
14b	CC1OC2(CCN(CCC3=CC=CC=C3)CC2)CN(CCC4=CC=CC=C4)C1=O	Free base	20 ± 2	22 ± 13	94	12 ± 2	4.3	0.2	58
14c	O=C(N(C1CC1)C2)[C@@H](C)OC32CCN(CCC4=CC=CC=C4)CC3	HCl	6 ± 1	7 ± 1	91	58 ± 15	2.7	4.5	51
14d	CC1OC2(CCN(CCC3=CC=CC=C3)CC2)CN(C(C)C)C1=O	Free base	33 ± 5	21 ± 2	100	30 ± 5	3.2	3.9	35
14e	CC1OC2(CCN(CCC3=CC=CC=C3)CC2)CN(CC)C1=O	HCl	41 ± 12	65 ± 4	84	43 ± 5	2.9	3.1	27
14f	CC1OC2(CCN(CCC3=CC=CC=C3)CC2)CN(C)C1=O	HCl	156 ± 5	787 ± 162	79	142 ± 28	2.2	>10	16
14g	C[C@@H](O1)C(N(C)CC21CCN(CCC3=CC=CC=C3)CC2)=O	HCl	91 ± 10	319 ± 104	83	277 ± 76	2.2	>10	19
14h	C[C@H](O1)C(N(C)CC21CCN(CCC3=CC=CC=C3)CC2)=O	HCl	>1000	1780 ± 196		165 ± 55	2.2		6
14i	CN(C1)C(COC21CCN(CCC3=CC=CC=C3)CC2)=O	HCl	>1000	>1000		282 ± 48	1.9		36
14j	CN(C1)C([C@@H](CC)OC21CCN(CCC3=CC=CC=C3)CC2)=O	HCl	192 ± 41	505 ± 122	90	139 ± 16	4.1	6.6	13
14k	O=C(N(C)C1)C(C(C)C)OC21CCN(CCC3=CC=CC=C3)CC2	Free base	115 ± 39	174 ± 42	85	122 ±24	3.1	6.2	29
14l	O=C1C(C2=CC=CC=C2)OC3(CCN(CCC4=CC=CC=C4)CC3)CN1C	HCl	>1000	>1000		242 ± 13	3.4		26
14m	CN(C1)C(C(C)(C)OC21CCN(CCC3=CC=CC=C3)CC2)=O	HCl	>1000	624 ± 35		50 ± 5	2.9		37
14n	CN(C1)C(C2(CC2)OC31CCN(CCC4=CC=CC=C4)CC3)=O	HCl	221 ± 51	442 ± 65	85	161 ± 43	2.2	3.6	41
14o	C[C@@H](O1)C(N(CC)CC21CCN(CCC3=CC=CC=C3)CC2)=O	HCl	26 ± 4	49 ± 4	83	66 ± 19	2.9	4.7	14
14p	CCN(C1)C([C@@H](C)OC21CCN(CCC3=CC=CC=C3F)CC2)=O	HCl	18 ± 7	24 ± 3	84	68 ± 18	3.1	4	15
14q	CCN(C1)C([C@@H](C)OC21CCN(CCC3=CC=CC(F)=C3)CC2)=O	HCl	56 ± 17	56 ± 21	83	64 ± 30	3.1	6.6	42
14r	CCN(C1)C([C@@H](C)OC21CCN(CCC3=CC=C(F)C=C3)CC2)=O	HCl	164 ± 29	108 ± 42	81	76 ± 12	3.1	1.5	21
14s	CCN(C1)C([C@@H](C)OC21CCN(CCC3=CC=CC(F)=C3F)CC2)=O	HCl	22 ± 10	10 ± 1	90	556 ± 266	3.1	>10	8
14t	CCN(C1)C([C@@H](C)OC21CCN(CCC3=CC=C(F)C=C3F)CC2)=O	HCl	62 ± 25	53 ± 17	92	94 ± 12	3.2	2.5	11
14u	CCN(C1)C([C@@H](C)OC21CCN(CCC3=CC(F)=CC=C3F)CC2)=O	HCl	64 ± 5	52 ± 1	90	118 ± 7	3.2	>10	21	349	7.9	2.7	2	17.7	45.1	1	Negative	64%	14 mg/kg	40%	56% (at 5 mg/kg, ip)
14v	CCN(C1)C([C@@H](C)OC21CCN(CCC3=C(F)C=CC=C3F)CC2)=O	HCl	21 ± 6	16 ± 1	95	609 ± 253	3.2		10
14w	CCN(C1)C(C2(CC2)OC31CCN(CCC4=CC=CC=N4)CC3)=O	HCl	>1000	1498 ± 145		783 ± 300	1.2		0
14x	CCN(C1)C([C@H](C)OC21CCN(CCC3=CC(F)=CC=C3F)CC2)=O	HCl	>1000	910 ± 9		135 ± 22	3.2	>10	9
17	O=C(NC1)C(C)OC21CCN(CCC3=CC=CC=C3F)CC2	HCl	>1000	>1000		892 ± 196	1.8	>10	7
